# Supplementary material for: Telomerase Mutations in Families with Idiopathic Pulmonary Fibrosis
Source: Atypon-hosted journal article supplement (doi:10.1056/nejmoa066157), 2007-03-28
Supplement: nejm_armanios_1317sa1.pdf [file nejm_armanios_1317sa1.pdf]

## Supplementary Appendix

This appendix has been provided by the authors to give readers additional information about their work.

Supplement to: Armanios MY, Chen JJ-L, Cogan JD, et al. Telomerase mutations in families with idiopathic pulmonary fibrosis. *N Engl J Med* 2007;356:1317-26.

**Supplementary Table 1.** Clinical Features of Relatives of Probands with Telomerase Mutations

| <b>Pedigree ID</b> | <b>Gender</b> | <b>Age at diagnosis (death)</b> | <b>Method of Diagnosis</b>          | <b>Clinical Impression</b> |
|--------------------|---------------|---------------------------------|-------------------------------------|----------------------------|
| All.4              | M             | 61 (d.63)                       | Family history, Autopsy             | UIP/IPF                    |
| BIII.1             | F             | 52 (d.63)                       | Records, CXR, CT, Biopsy            | IIP not classifiable       |
| BIII.2             | M             | 64 (d.67)                       | Records, CXR, CT, Biopsy            | UIP/IPF                    |
| CII.1              | M             | 67 (d. 68)                      | Family history                      | Probable IPF               |
| CII.5              | F             | 58 (d.61)                       | Records, CXR, CT                    | IPF                        |
| DII.1              | M             | 50 (d.56)                       | Family history, Death certificate   | IPF                        |
| EI.2               | F             | 61 (d.64)                       | Family history, Death certificate   | IPF                        |
| FI.2               | F             | (d.69)                          | Family history                      | Possible IPF               |
| FII.3              | F             | (d.70)                          | Family history                      | Possible IPF               |
| FII.7              | F             | 62 (d.63)                       | Records, CXR, Transbronchial biopsy | IPF                        |
| FII.9              | F             | 54 (d.57)                       | Family history                      | Possible IPF               |
| FII.11             | M             | (d.60)                          | Records, CXR, Death certificate     | IIP not classifiable       |
| FIII.2             | M             | (d.72)                          | Family history                      | Possible IPF               |

Abbreviations UIP: usual interstitial pneumonia, IIP: idiopathic interstitial pneumonia

**Supplementary Table 2**  
**hTERT Amplifying and Sequencing Primers**

| <b>Exon</b> | <b>Forward Primer</b> | <b>Sequence</b>          | <b>Reverse Primer</b> | <b>Sequence</b>          |
|-------------|-----------------------|--------------------------|-----------------------|--------------------------|
| 1           | TERT1F                | gagtttcagggcagcgctgcgctc | TERT1sR               | caggtgaaccagcagctcgtcgc  |
| 2           | TERTsF                | caacacggtgaccgacgcactg   | TERT1R                | ctgtgcgctgaggagtagag     |
| 2           | TERT2F                | caggacgctggaccgagtgacc   | TERT2R                | gtgaacctcgtaagttatgc     |
| 3           | TERT3F                | cttggtgagctggatgtgcggtg  | TERT3R                | gagcctgcacagaatccacttg   |
| 4-5         | TERT4F                | gcctcctgaggggctctctattg  | TERT5R                | ctccaaggtccagcagggctgc   |
| 6           | TERT6F                | gccggatccacttctgactgt    | TERT6R                | cacagacacgactgcattctagac |
| 7           | TERT7F                | gtctgatgtgtggtagctgcag   | TERT7R                | caacagtctgtccggatcatgag  |
| 8           | TERT8F                | gtggtcctgcctgtctcagcacc  | TERT8R                | gcttgccattccaggcctcgtg   |
| 9           | TERT9F                | ggctgaatggtagacgtgtcg    | TERT9R                | gagcagtcattggtctccagagc  |
| 10          | TERT10F               | gcacagaattgcacaagctgatg  | TERT10R               | ctgctctgaggatccagcacc    |
| 11          | TERT11F               | gcatcctggggctgacattgcc   | TERT11R               | cagccggggcacaggctccact   |
| 12          | TERT12F               | gtccatggagtgagcaccagc    | TERT12R               | cagtcaccatcagccttgag     |
| 13          | TERT13F               | gatgacacagagtctgactcgc   | TERT13R               | cggaacagaactgtgcacag     |
| 14          | TERT14F               | cacaccacagagcaccgtctg    | TERT14R               | acagggcgtcaaggatgacc     |
| 15          | TERT15F               | tgtgactcctcagcctctgtt    | TERT15R               | cagcagcatctgaggctgctcg   |
| 16          | TERT16F               | gccgctccagcgtcactg       | TERT16R               | agtgcacattaggattca       |

## Supplementary Figure 1

Chromatograms of Telomerase Mutations in Probands from Families A-F

**All.1 *hTERT* Exon 1 CTG→CAG Leu55Gln**

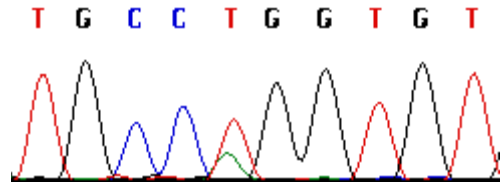

**BIII.5 *hTERT* IVS 1+1 G→A**

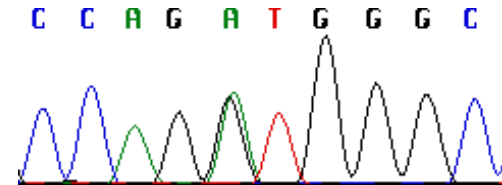

**CII.7 *hTERT* Exon 2 del C codon 112**

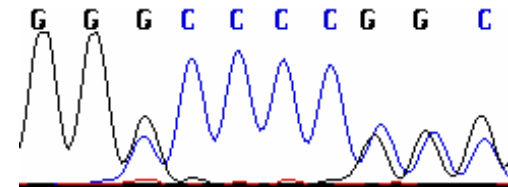

**DIII.2 *hTERT* IVS 9-2 A→C**

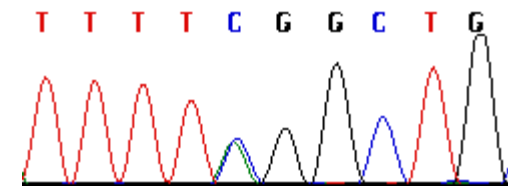

**EII.2 *hTERT* Exon 16 ACG→ATG Thr1110Met**

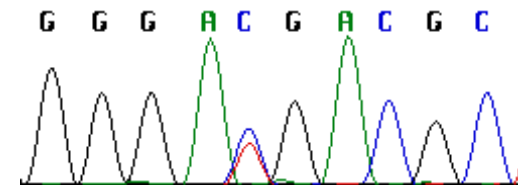

**FIII.5 *hTR* 98 G→A**

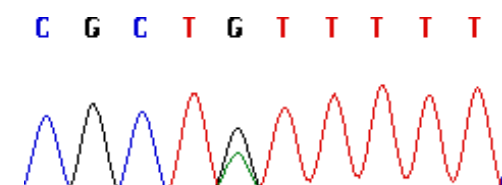

**Supplementary Table 3**  
**Sequence Variants in *hTERT* Identified in IPF Probands**

| Location  | Variant                               | 3' flanking sequence | Minor Allele Frequency (per n=73) | Previous Report* |
|-----------|---------------------------------------|----------------------|-----------------------------------|------------------|
| Exon 2    | c.835 G→A (Ala279Thr)                 | CCGAAGAAGC           | 0.03                              | 0.02**           |
|           | c.915 G→A (Ala305Ala)                 | GGCCCCCAT            | 0.47                              | rs2736098        |
|           | c.1269 C→T (Ala423Ala)                | GGTGTCTGTG           | 0.01                              |                  |
| Intron 2  | IVS2+39 G→C                           | CTGAATGCAG           | 0.07                              |                  |
| Intron 3  | IVS 3+130 C→A                         | GTCACAGGCC           | 0.50                              | rs7725218        |
|           | IVS3+137 G→A                          | GCCTGGTCCA           | 0.01                              |                  |
| Exon 4    | c.1812 A→G (Ala604Ala)                | GAGGTCAGGC           | 0.03                              |                  |
| Intron 4  | IVS4+10C→T                            | TTTGGTTTAA           | 0.01                              |                  |
|           | IVS4+145 A→G                          | GTGAGGTGGC           | 0.42                              | rs7734992        |
|           | IVS4+245 C→T                          | GGGCCRGGGC           | 0.26                              | rs2242652        |
|           | IVS4+309 C→G                          | CTCCGTGCGC           | 0.38                              | rs10054203       |
|           | IVS4+483 G→A                          | TGGCATGAGG           | 0.29                              | rs10069690       |
|           | IVS4+572 G→A                          | GGTCTGGGTG           | 0.01                              |                  |
| Exon 5    | c.2031 C→T (Gly677Gly)                | GCCTCTGTGC           | 0.01                              |                  |
|           | Ala699Ala C→T                         | GCCGCTGTAC           | 0.03                              |                  |
|           | c.2106 G→A (Pro702Pro)                | CCGCCTGAGC           | 0.01                              |                  |
| Intron 5  | IVS5+182 A→C                          | TGGGGCCGAC           | 0.10                              |                  |
| Intron 6  | IVS6-160 G→A                          | CCCCCGTTTC           | 0.03                              |                  |
|           | IVS6-156-155 ins<br>GGCCCCC2→GGCCCCC3 | GTTTCCCAA            | 0.01                              |                  |
| Intron 9  | IVS9-121 C>T                          | GCTTTGGAGA           | 0.01                              |                  |
| Intron 12 | IVS12+25-27 +AG→AG                    | GTTCAGAGTT           | 0.01                              |                  |
|           | IVS12+59 TG8→TG9                      | CRCGCGTGCC           | 0.01                              |                  |
|           | IVS12+75 G→A                          | CGCGTGCCTG           | 0.04                              |                  |
| Intron13  | IVS13+46 C→T                          | GCGCTCTGCT           | 0.01                              |                  |
|           | IVS13+137 C→A                         | CTGTGCACAG           | 0.12                              |                  |
| Exon 14   | c.3039 C→T (His1013His)               | GCATGTGTGC           | 0.14                              |                  |
| Intron14  | IVS14-94 C→T                          | CCCGCAGACC           | 0.01                              |                  |
| Exon 15   | c.3184 G→A (Ala1062Thr)               | CCGGCCCTST           | 0.07                              | 0.01**           |
|           | c.3193 C→G (Leu1065Leu)               | TGCCCTCCGA           | 0.01                              |                  |
| Intron15  | IVS15+101 C→T                         | GCCCCCGGGC           | 0.01                              |                  |
| Exon 16   | c.3324 G→A (Pro1108Pro)               | GGAAGCTCCC           | 0.05                              |                  |
| 3'UTR     | C*99 C→T                              | GCACCGCTGGG          | 0.49                              | rs2853690        |

\* rs identifiers refer to base pair changes cataloged in dbSNP v.126, released 2006.

\*\* Allele frequency in 528 controls reported in Yamaguchi et al *NEJM* 2005.

## **Author Contributions**

Dr. Armanios conceived of the idea, designed the study, performed some of the sequencing, analyzed the data and wrote the paper. Mr. Alder performed the RT-PCR. Ms. Ingersoll analyzed and interpreted the bulk of the sequencing data. Dr. Greider participated in the data interpretation and the writing of the paper. Dr. Chen designed and analyzed the telomerase biochemical studies performed by Mr. Xie. Dr. Lansdorp designed and analyzed the flow-fish studies performed by Ms. Vulto. Drs. Phillips and Loyd established the registry. Drs. Cogan and Phillips oversaw the patient sample selection and processing. Dr. Loyd assessed the families, obtained and analyzed the clinical data. Dr. Lawson reviewed the clinical histories in detail. Ms. Markin was the study coordinator. Drs. Armanios, Greider and Loyd decided to publish the paper. All the authors reviewed the paper and vouch for the data.
